# Supplementary material for: Transient fertilization of a post-Sturtian Snowball ocean margin with dissolved phosphate by clay minerals
Source: Nat Commun. 2023 Dec 18;14:8418. doi: 10.1038/s41467-023-44240-9 (PMC10728154; doi:10.1038/s41467-023-44240-9)
Supplement: Supplementary file 1 — Supplementary Information [file 41467_2023_44240_MOESM1_ESM.pdf]

# Supplementary information

## **Transient fertilization of a post-Sturtian Snowball Ocean margin with dissolved phosphate by clay minerals**

Ernest Chi Fru<sup>1\*</sup>, Jalila Al Bahri<sup>1</sup>, Christophe Brosseau<sup>1</sup>, Abderrazzak El Albani<sup>2</sup>, Olabode Bankole<sup>2</sup>, Jérémie Aubineau<sup>3</sup>, Alexandra Nederbragt<sup>1</sup>, Anthony Oldroyd<sup>1</sup>, Alasdair Skelton<sup>4</sup>, Linda Lowhagen<sup>4</sup>, David Webster<sup>4</sup>, Wilson Y. Fantong<sup>5</sup>, Benjamin JW Mills<sup>6</sup>, Lewis J. Alcott<sup>6</sup>, Kurt O. Konhauser<sup>7</sup>, Timothy W. Lyons<sup>8</sup>

<sup>1</sup>College of Physical and Engineering Sciences, School of Earth and Ocean Sciences, Centre for Geobiology and Geochemistry, Cardiff University, Cardiff CF10 3AT, Wales, UK

<sup>2</sup>Université de Poitiers UMR 7285-CNRS, Institut de Chimie des Milieux et Matériaux de Poitiers - 5, rue Albert Turpin (Bât B35) 86073 Poitiers cedex, France

<sup>3</sup>Géosciences Environnement Toulouse, CNRS UMR 5563 (CNRS/UPS/IRD/CNES), Université de Toulouse, Observatoire Midi-Pyrénées, Toulouse, France

<sup>4</sup>Department of Geological Sciences, Stockholm University, 106 91 Stockholm, Sweden

<sup>5</sup>Institute of Geological and Mining Research (IRGM), Box 4110, Yaoundé-Cameroon

<sup>6</sup>School of Earth and Environment, University of Leeds, Leeds LS2 9JT, UK

<sup>7</sup>Department of Earth and Atmospheric Sciences, University of Alberta  
Edmonton, Alberta, T6G 2E3, Canada

<sup>8</sup>Department of Earth and Planetary Sciences, University of California, Riverside, CA 92521, U.S.A

\*Corresponding author: ChiFruE@Cardiff.ac.uk

### **Sedimentation rates and the iron-based redox proxy**

The best estimate is that the BDF succession up to the top of member 3, formed within 250 Kyr following the end of the Sturtian snowball glaciation, according to the following logic:

(1) In the original Snowball Earth hypothesis, cap carbonates were thought to have formed within 10 Kyr, based on instantaneous melting models. However, subsequent magnetic reversals within cap carbonates pointed to longer timeframes, consistent with post-glacial sediment starvation because of seawater level rise<sup>15</sup>. There is a transition from coarse-grained sediments to being very fine grained up the studied sequence, consistent with a rise in seawater level and reduction in detrital loading after the Sturtian glaciation.

(2) Globally,  $\delta^{13}\text{C}_{\text{carbonate}}$  values generally recover from -5‰ towards more positive excursions following the transition from the Sturtian icehouse into the greenhouse interval<sup>5,16</sup>. Similarly, published  $\delta^{13}\text{C}_{\text{carbonate}}$  values for the immediate Bonahaven dolomite formation (BDF) succession upwards to member 3, as are our data, switch towards a more positive  $\delta^{13}\text{C}_{\text{carbonate}}$  values immediately above the PATF.

(3) The abrupt shift of  $\delta^{13}\text{C}_{\text{carbonate}}$  to up to +10‰ in member 4 in the BDF is far more extreme than any reported worldwide, leading some workers to equate this to the “Keele Peak” in Canada. However, the occurrence of member 4 halfway up the Sturtian post-Snowball interval towards the Marinoan Snowball Earth poses a problem, particularly because member 4 is estimated to be older than the Keele Peak. Although no explanation for the anomalous positive  $\delta^{13}\text{C}_{\text{carbonates}}$  value was given, Fairchild interpreted member 4 in a PhD thesis as a supratidal dolomitic deposit. Therefore, the top of member 3 in the BDF lies within the bounds of the timeframe when the negative  $\delta^{13}\text{C}_{\text{carbonates}}$  values were yet to consistently rise towards the strong positive values recorded in member 4.

(4) In the absence of radiometric dates for the BDF, we use unique cyclostratigraphic constraints in the widely accepted classic Sturtian Snowball Earth succession in Svalbard<sup>4</sup>, to estimate sedimentation rates for the BDF. Here, the  $\delta^{13}\text{C}_{\text{carbonate}}$  values  $> -5\text{‰}$  are consistently recorded up to ~10 m in the immediate post-glacial section which terminates in a shale facies succession. Within this succession, 0.5 m thick precessional cycles estimated to represent 18 Kyr in duration are linked to 6-8 Myr interglacials<sup>17</sup>. To a first approximation, the 10 m thick succession above which  $\delta^{13}\text{C}_{\text{carbonate}}$  switches to  $\geq -5\text{‰}$  values, formed over an estimated 200-250 Kyr interval, is related to the time of deposition of the 300 m thick BDF unit up to member 3, based on stratigraphical correlation and similar and consistent  $\leq -5\text{‰}$   $\delta^{13}\text{C}_{\text{carbonate}}$  values. This suggests an estimated 30 times faster sedimentation rate for the BDF compared to the Svalbard succession, accounted for by syndepositional faulting and basin subsidence associated with the Dalradian Supergroup.

This has implications for the accuracy of the iron-based redox proxy because sedimentation rates of up to  $0.0077 \text{ m yr}^{-1}$  are reported to falsify its sensitivity and accuracy<sup>18-20</sup>. The above calculations suggest a maximum sedimentation rate of  $0.0015 \text{ m yr}^{-1}$  for the BDF up to member 3, which is 4× slower than the rate expected to strongly interfere with the accuracy of the iron-based redox proxy<sup>18-20</sup>.

Moreover, evidence suggests that depositional rates during the formation of the BDF sequence, switched to a slower pace because of global seawater transgression slowing down sediment supply to the basin. Hence if anything, the iron-based proxy is expected to become more accurate in their prediction of bottom seawater oxygenation at this time, as false oxygenation trends can be produced during rapid sediment accumulation<sup>18-20</sup>. The signal remains consistently anoxic during the deposition of the 1.1 km thick PATF succession, whose sedimentation rates were likely much faster than for the BDF. Moreover, throughout the sequence, the redox signal appears unaffected by carbonate concentration; staying consistently anoxic or oxic, depending on the interval, regardless of whether carbonate concentrations varied from near 0.0 wt.% to 50 wt.%.

## Supplementary Figures

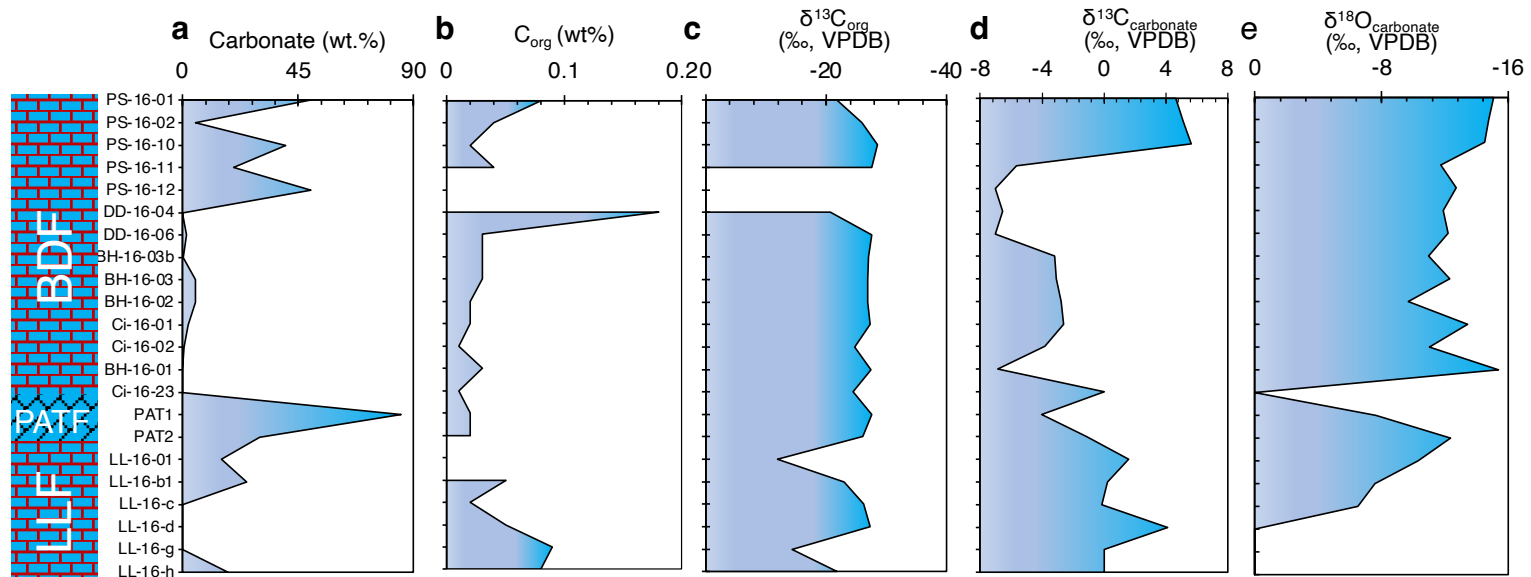

**Fig. S1** | Carbon systematics for representative samples plotted along sequence stratigraphy. **(a)** Carbonate concentration. **(b)**  $C_{org}$  concentration. **(c)** Table carbon isotope ratios in organic carbon. **(d)** Carbon isotope ratios in carbonates. **(e)** Oxygen isotope ratios in carbonates. BDF, Bonahaven Dolomite Formation (BDF). PATF, Port Askaig Tillite Formation. LLF, Lossit Limestone Formation. VPDB, Vienna Pee Dee Belemnite. PAT1 and PAT2 are samples collected at Port Askaig.

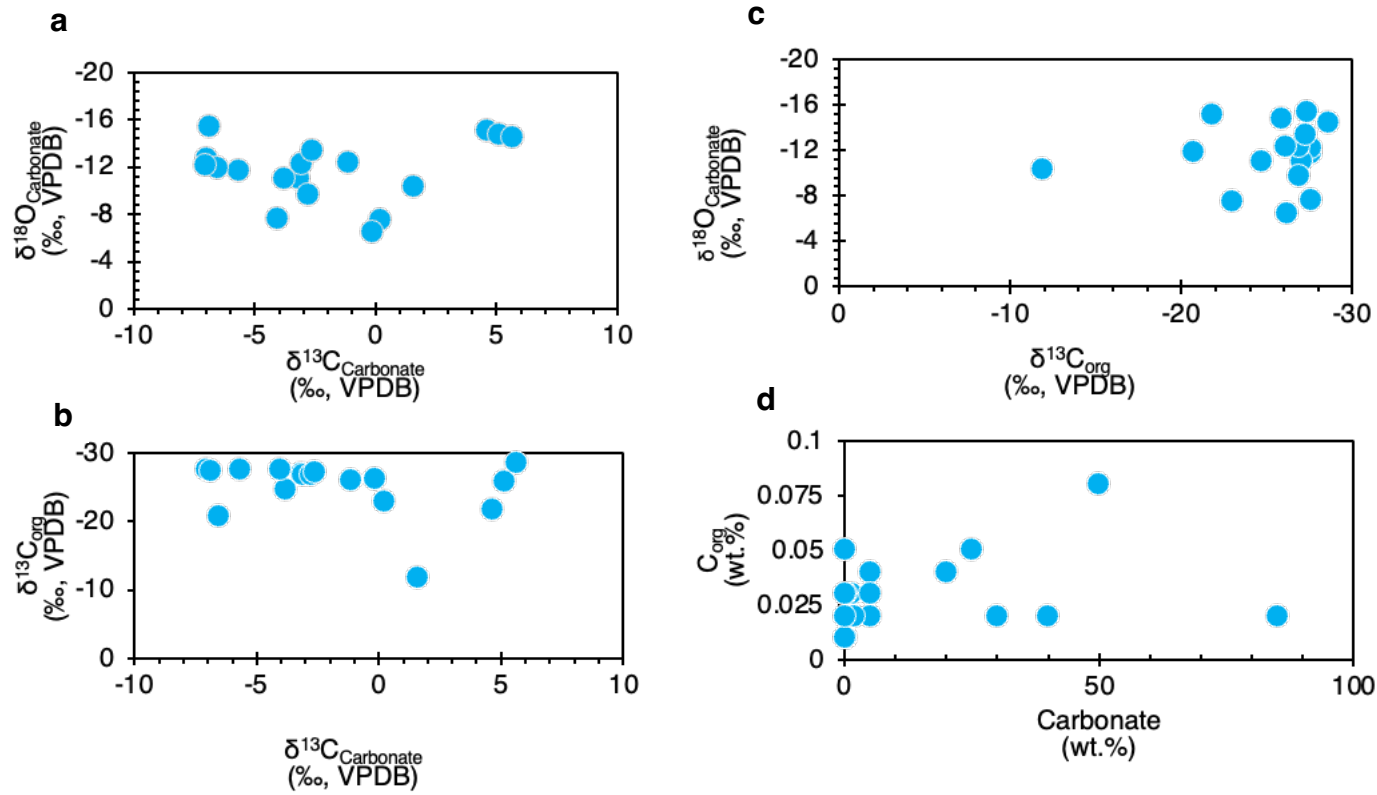

**Fig. S2 | (a)**  $\delta^{18}\text{O}_{\text{carbonates}}$  versus  $\delta^{13}\text{C}_{\text{carbonate}}$  cross plot.  $\delta^{18}\text{O}_{\text{carbonates}}$  values are spread between  $-15.09\text{‰}$  up to  $-6.48\text{‰}$ , averaging  $-11.66 \pm 2.26\text{‰}$ . Average  $\delta^{13}\text{C}_{\text{carbonates}}$  values of  $-2.04 \pm 4.1\text{‰}$  range from as low as  $-7.02\text{‰}$  and up to  $+5.64\text{‰}$ . **(b)**  $\delta^{13}\text{C}_{\text{org}}$  versus  $\delta^{18}\text{O}_{\text{carbonates}}$  cross plots.  $\delta^{13}\text{C}_{\text{org}}$  values are typically photosynthetic, ranging from  $-11.87\text{‰}$  to  $-28.57\text{‰}$ , with an average of  $-24.51 \pm 4.36\text{‰}$ . **(c)**  $\delta^{18}\text{O}_{\text{carbonate}}$  versus  $\delta^{13}\text{C}_{\text{org}}$  cross plot. **(d)**  $\text{C}_{\text{org}}$  versus carbonate content cross plot. Carbonate concentrations in the sample suite range from 0.01 wt.% and up to 85 wt.%, averaging  $17.6 \pm 23.45$  wt.% across sequence stratigraphy.  $\text{C}_{\text{org}}$  values average  $0.044 \pm 0.039$  wt.% and range from 0.01 to 0.18 wt.%. The data show that the highest carbonate concentrations are recorded in dolomite-rich samples further up from the interval immediately following the deglaciation in the Bonahaven Dolomite Formation and in the underlying pre-glacial Lossit Limestone Formation. The lowest carbonate concentrations are encountered in the immediate post-glacial deposits. Organic carbon concentrations are generally low across sequence stratigraphy. They range from 0.02-0.08 wt.%, averaging 0.038 wt.%. No correlation was found between the different variables, as common for Proterozoic  $\text{C}_{\text{org}}$  and carbonate concentrations. The absence of correlation between  $\delta^{13}\text{C}_{\text{carbonates}}$  and  $\delta^{18}\text{O}_{\text{carbonates}}$  is interpreted to suggest limited diagenetic alteration of the primary  $\delta^{13}\text{C}_{\text{carbonates}}$  signal<sup>1,2</sup>. Broadly, the data are consistent with primary C signatures that have been correlated world-wide to the Sturtian Snowball deposits<sup>3-7</sup>.

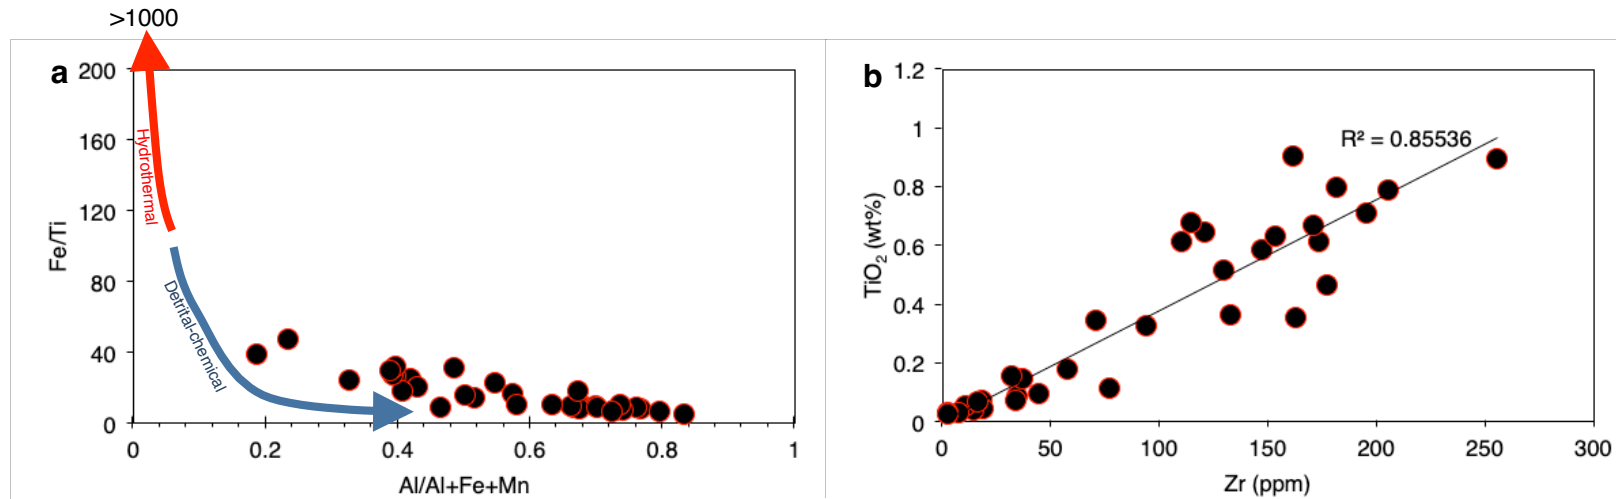

**Fig. S3 | (a)** Fe/Ti and Al/(Al+Fe+Mn) cross plots showing a mainly detrital origin for the sampled sequence. Red arrow=hydrothermal origin (cut off minimum threshold at  $100 \geq \text{Fe/Ti} > 1000$ ). Blue arrow shows continuous gradation towards mixed chemical+detrital to pure chemical sediments<sup>9</sup>. **(b)** Relationship between TiO<sub>2</sub> and Zr, showing that the analyzed rocks have a strong detrital origin.

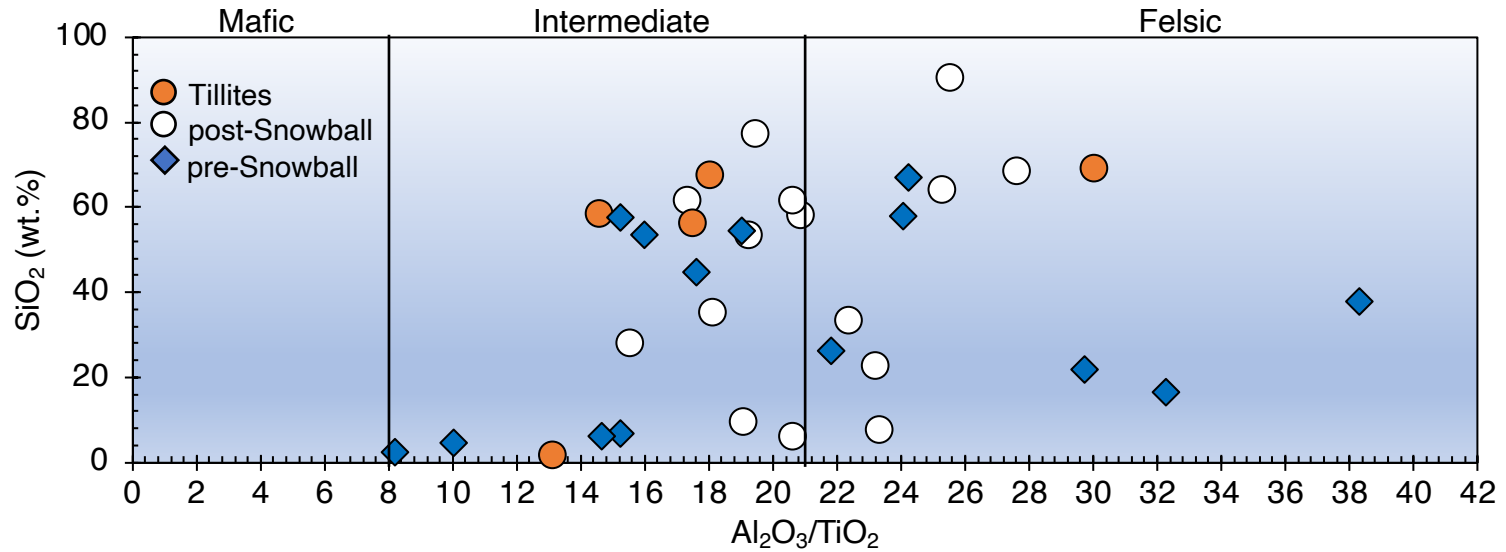

**Fig. S4** |  $\text{SiO}_2$  versus  $\text{Al}_2\text{O}_3/\text{TiO}_2$  ratios across lithostratigraphy. The distribution suggests the source provenance for the studied lithologies were mainly from intermediate-to-felsic rocks. In weathered igneous rocks, Al is hosted largely by mica and clays and residual feldspars, whereas Ti is hosted primarily by mafic minerals, including pyroxene, biotite, ilmenite. Therefore, the  $\text{Al}_2\text{O}_3/\text{TiO}_2$  ratio was used to broadly estimate the source rock composition, where  $\text{Al}_2\text{O}_3/\text{TiO}_2$  ratios  $< 8$ ,  $8-21$  and  $>21$ , approximate a mafic, intermediate igneous and felsic igneous source rock composition, respectively<sup>8</sup>.

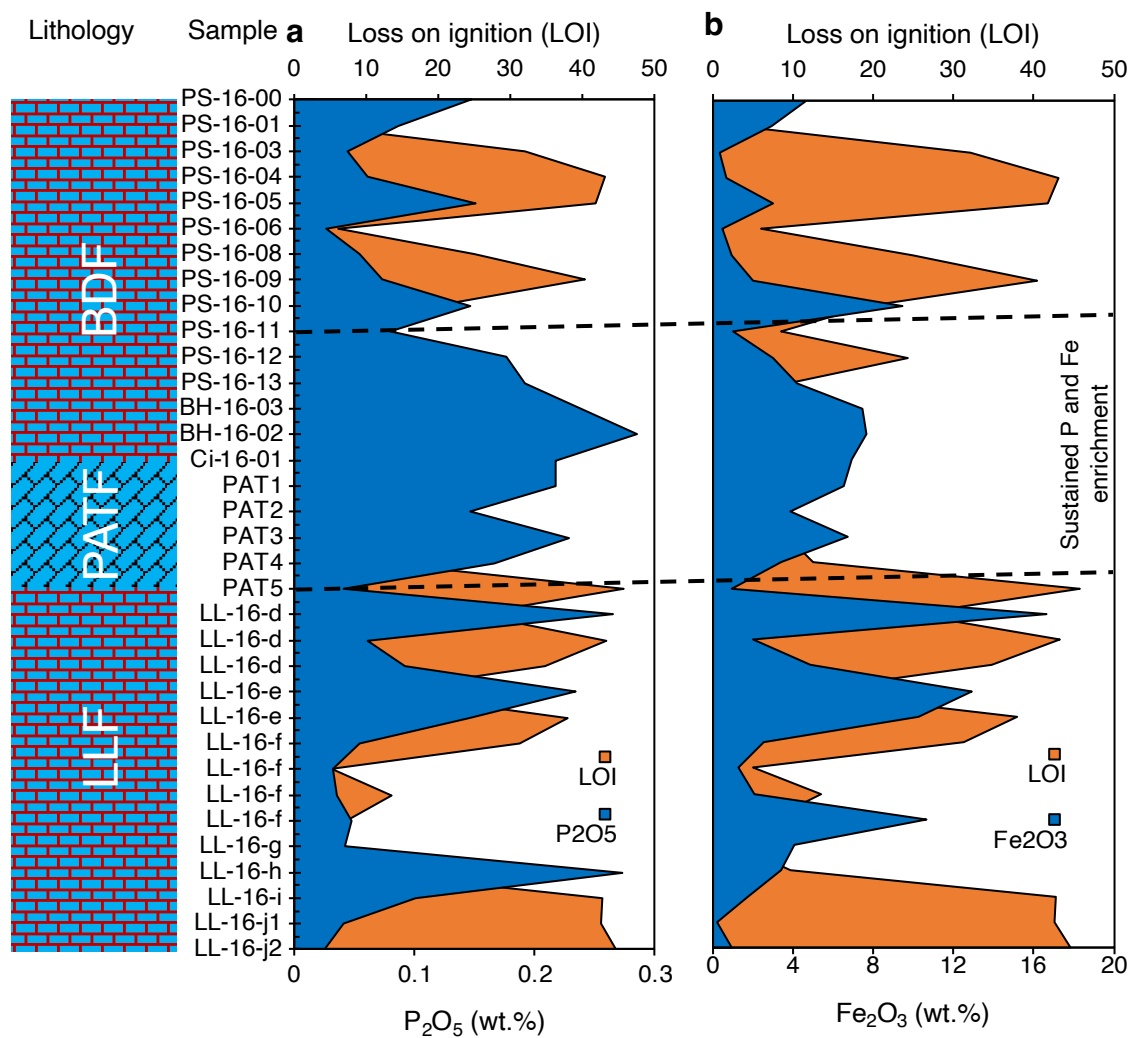

**Fig. S5** | Graphs showing an inverse oscillatory behaviour between **(a)** LOI versus  $P_2O_5$  and **(b)** LOI versus  $Fe_2O_3$  distribution across the sampled succession. LLF, Lossit Limestone formation. PATF, Port Askaig Tillite Formation. BDF, Bonahaven Dolomite. PAT1 and PAT2 are samples collected at Port Askaig. PAT3-PAT5 represent sample LL-16-a at the top of the LLF that conformably underlines the Port Askaig tillites.

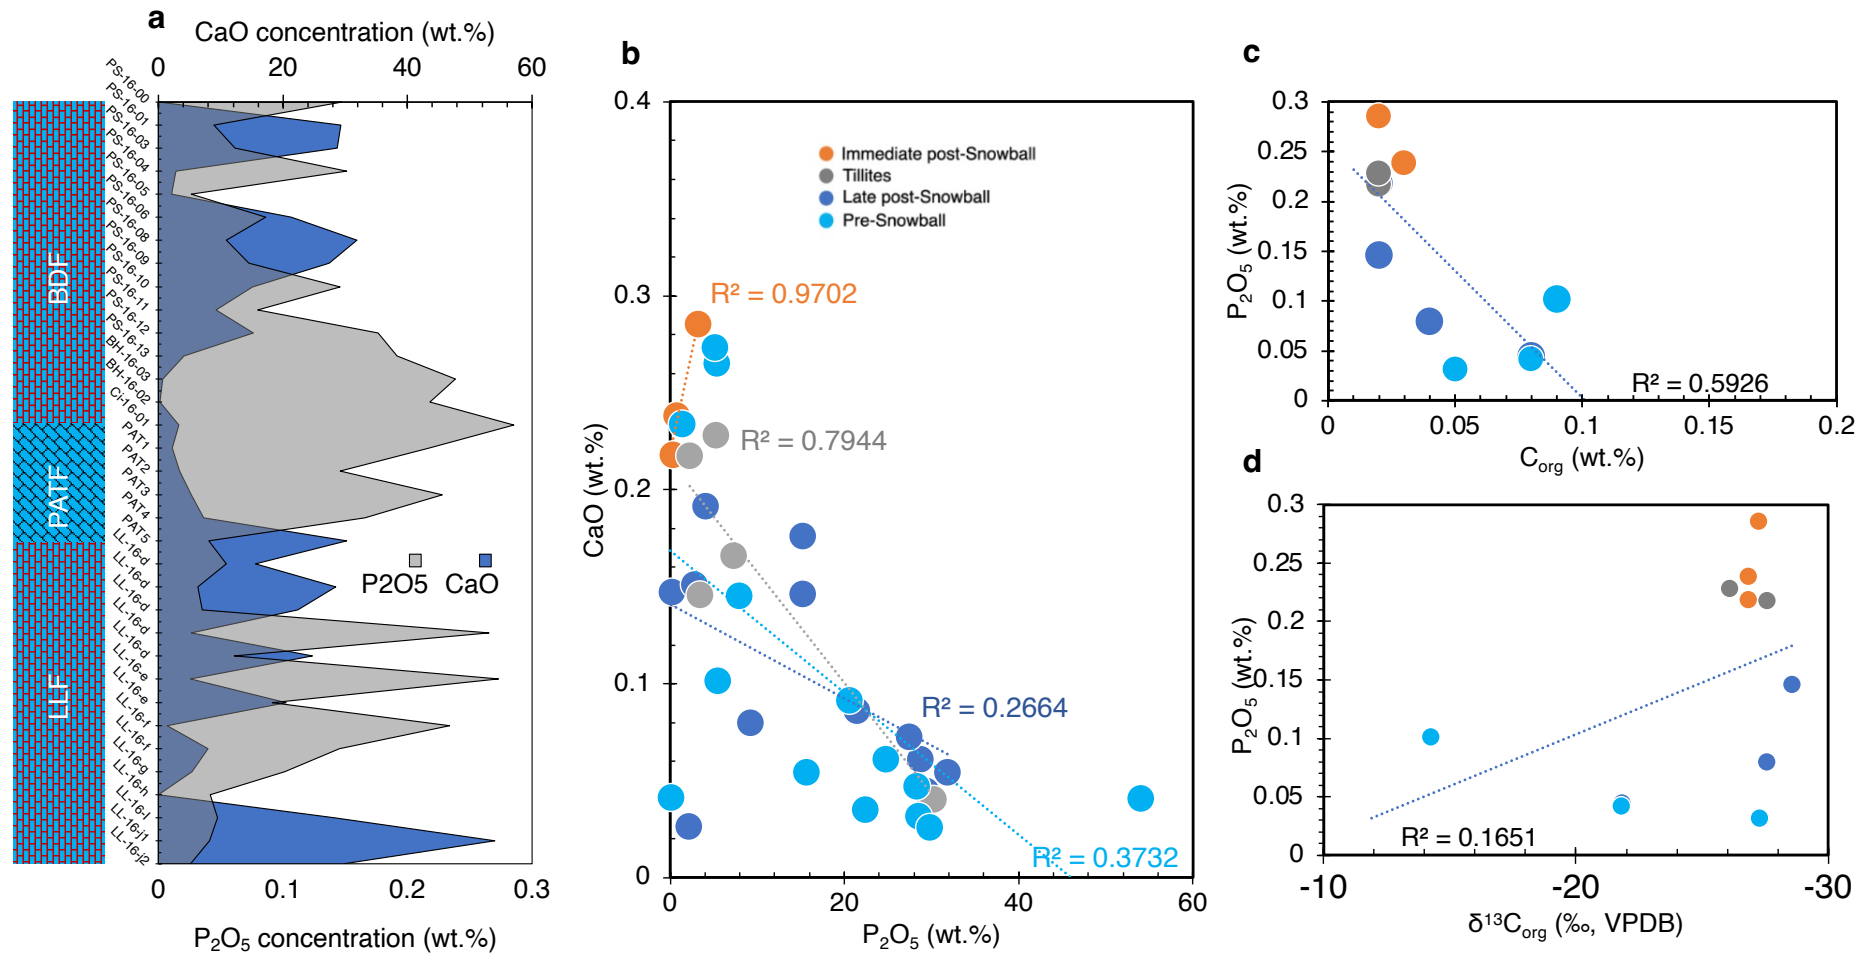

**Fig. S6 | Relationship between facies, Ca, P, C<sub>org</sub> and δ<sup>13</sup>C<sub>org</sub> content.** (a) CaO versus P<sub>2</sub>O<sub>5</sub> distribution along sequence stratigraphy. (b) CaO versus P<sub>2</sub>O<sub>5</sub> scatter plot. (c) Scatter plot for representative data available for P<sub>2</sub>O<sub>5</sub> and C<sub>org</sub>. (d) Scatter plot for representative data available for P<sub>2</sub>O<sub>5</sub> and δ<sup>13</sup>C<sub>org</sub>. PAT1 and PAT2 are samples collected at Port Askaig. PAT3 and PAT5 represent sample LL-16-a at the top of the LLF that conformably underlines the Port Askaig tillites.

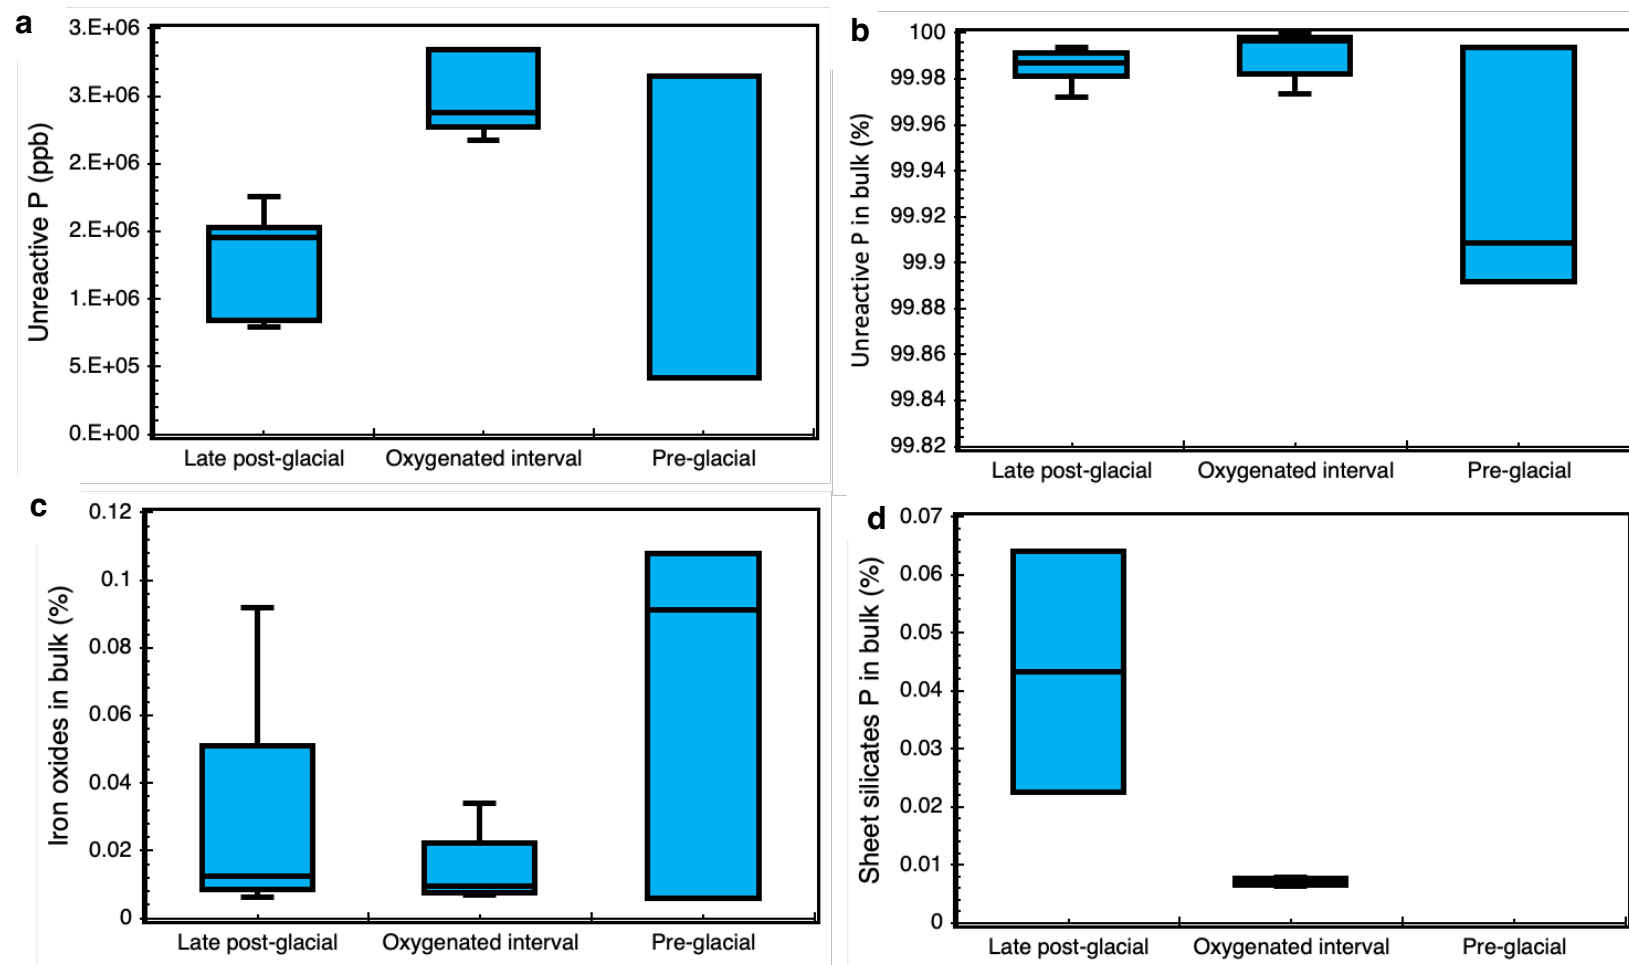

**Fig. S7** | Box and whisker plots showing P distribution in various mineral phases relative to bulk P concentrations ( $P_2O_5$ ) in low  $P_2O_5$  pre-Snowball Lossit Limestone Formation and immediate post-Snowball high  $P_2O_5$  and late post-snowball low  $P_2O_5$  intervals. Bulk unreactive P was calculated by deducting the concentrations of highly reactive iron oxide-bound P and sheet silicate (phyllosilicate) associated P from total bulk measurements for corresponding samples. **(a)** Total unreactive P in ppb. **(b)** % unreactive P in bulk. **(c)** % Fe oxide-bound P in bulk. **(d)** % sheet silicate P in bulk. Centre line = median value; whiskers = minimum and maximum values; box limits = lower and upper quartiles.

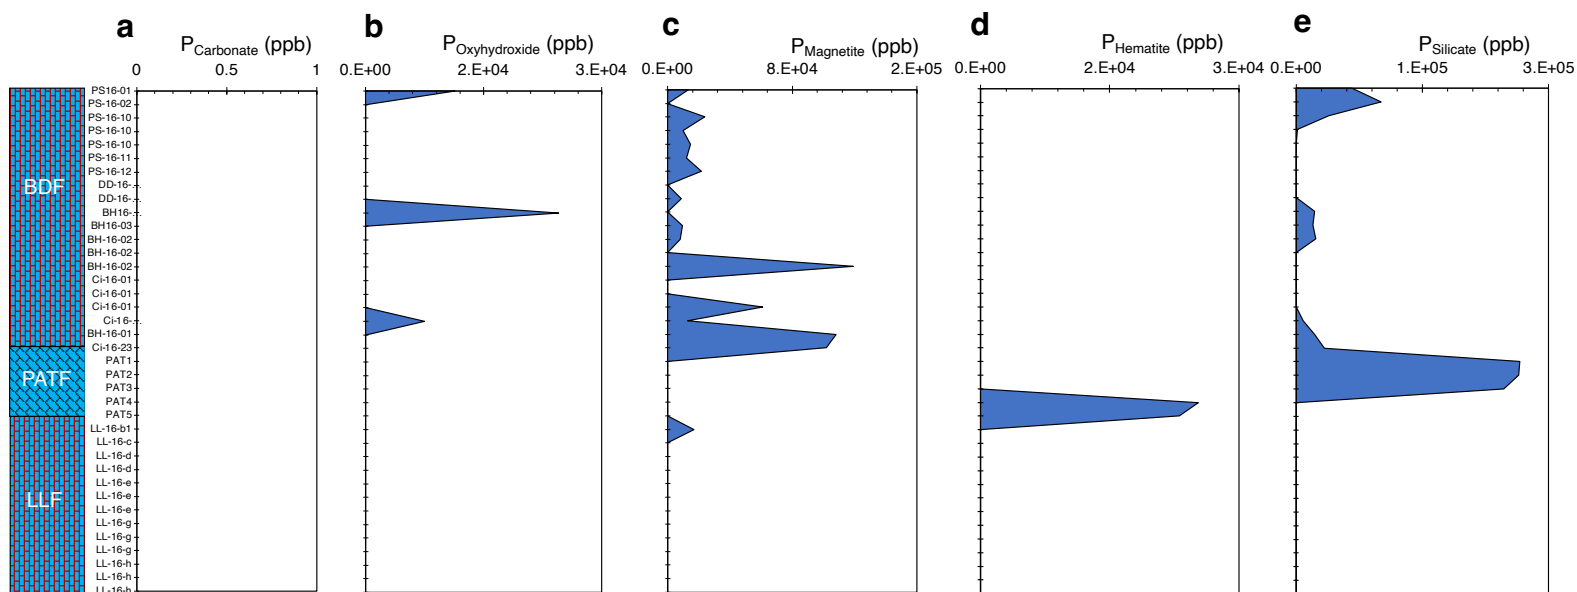

**Fig. S8** | Chemically extractable P associated with iron oxides and phyllosilicates (sheet silicates) phases. **(a)** Carbonate associated P. **(b)** Fe oxyhydr(oxide) associated P. **(c)** Magnetite associated P. **(d)** Hematite associated P. **(e)** Sheet silicate associated P. Points where there are no data imply values were below the analytical detection limit of ~5 ppb and must therefore not be interpreted to imply absence. The trends are considered representative of true P distribution, considering that all samples were normalized to the same procedural treatment and analysis. P-oxyhydr(oxides) represent extractions that include goethite, akageneite and some hematite. LLF, Lossit Limestone formation. PATF, Port Askaig Tillite Formation. PAT, Port Askaig Tillites. BDF, Bonahaven Dolomite.

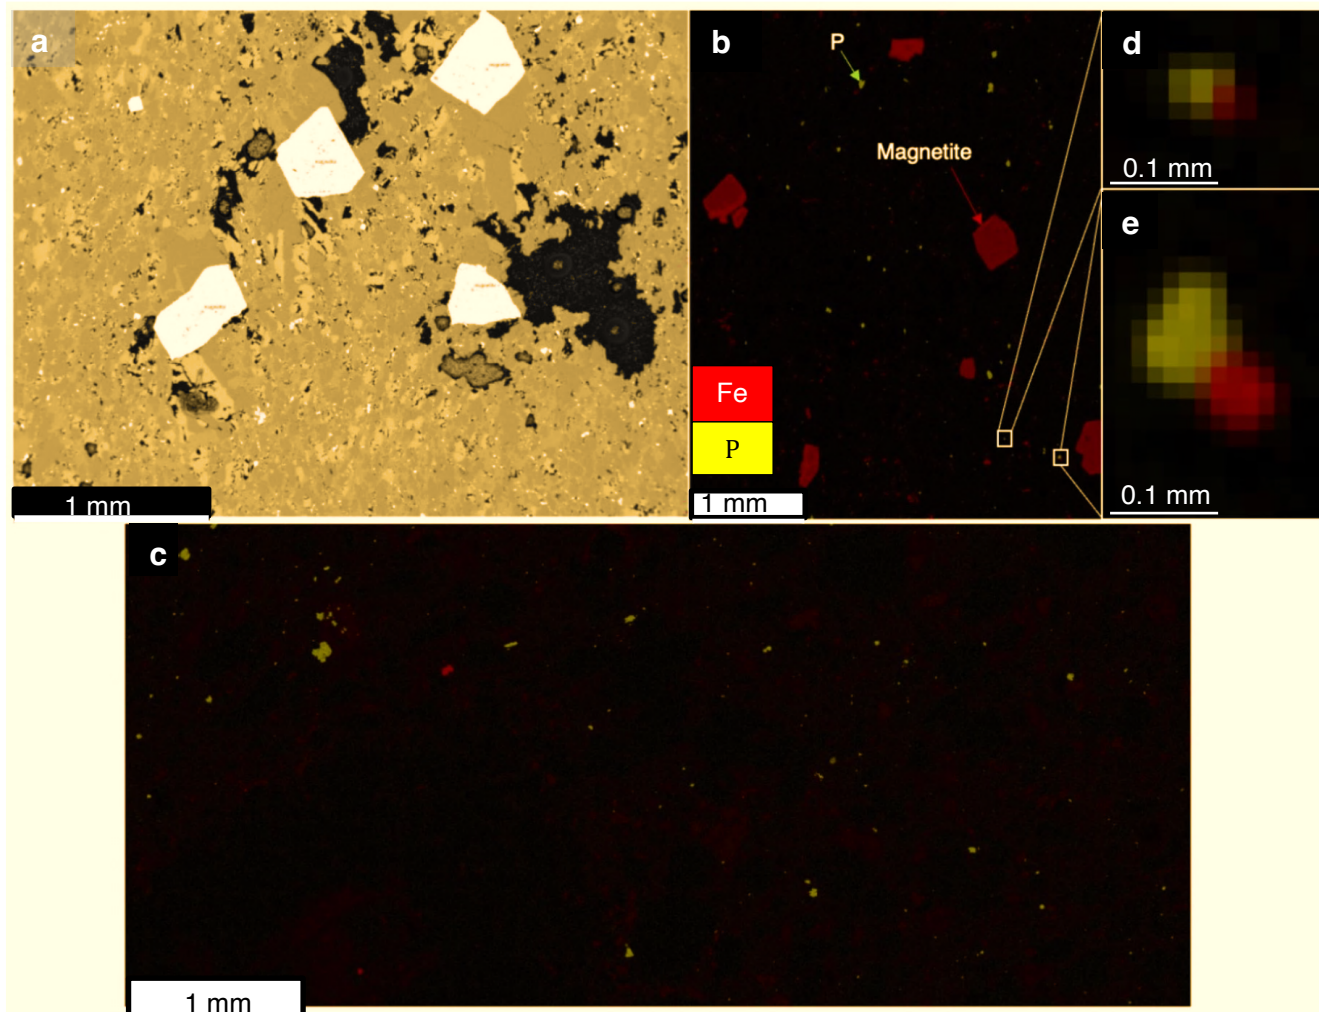

**Fig. S9** | Examples of back scatter electron (BSE) SEM and SEM-EDS mineral maps showing the distribution of Fe and P in a representative tillite and immediate post-Snowball sample. **(a)** BSE photomicrograph showing angular and subangular white iron oxide crystals identified as putative magnetite phases in the BH-16-02 immediate post-Snowball sample. **(b)** SEM photomicrograph showing association between magnetite particles and P. **(c-d)** Magnified particles from panel b showing co-occurrence of Fe and P in the immediate post-Snowball samples. **(e)** SEM photomicrograph showing the distribution of Fe and P in a tillite sample. Note the absence of the large blocky magnetite grains in the immediate post-Snowball sample in the tillites sample.

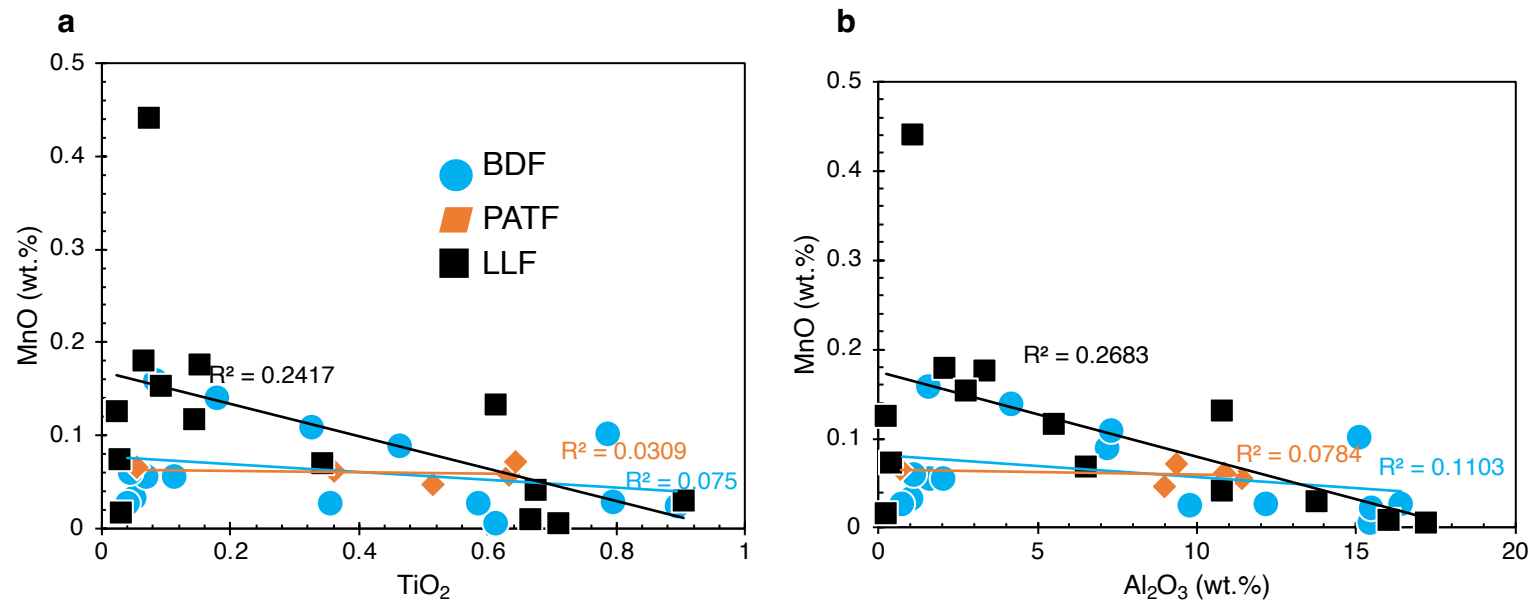

**Fig. S10 | MnO versus TiO<sub>2</sub> (a) and Al<sub>2</sub>O<sub>3</sub> (b) cross plots.** LLF, Lossit Limestone formation. PATF, Port Askaig Tillite Formation. BDF, Bonahaven Dolomite Formation.

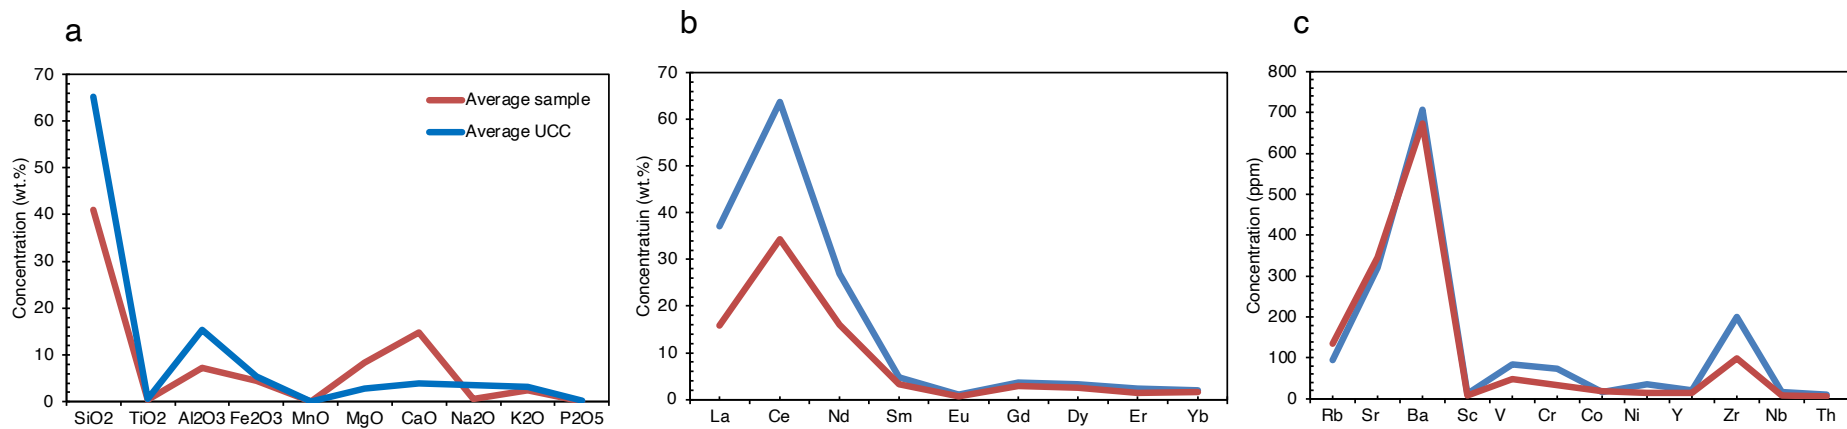

**Fig. S11 |** Average Upper Continental Crust (UCC) concentrations<sup>(ref. 10)</sup> for **(a)** major oxides (MO), **(b)** rare earth elements (REE) and **(c)** trace elements (TE) plotted against average sample values. The samples are relatively depleted in MO, REE and TE relative to UCC, but show similar trends to UCC, suggesting a strong UCC provenance for the sediments. Calcium isotopes have suggested a large flux of continental materials to the sea at the end of Snowball glaciations<sup>11</sup>, supported by Li isotopes indicative of CO<sub>2</sub>-induced silicate weathering<sup>12-14</sup>.

## Supplementary Tables

**Table S1** | Sample description.

| Locality                   | Coordinates              | Formation and Stratigraphy                                           |
|----------------------------|--------------------------|----------------------------------------------------------------------|
| <b>Port an t-Struthain</b> |                          |                                                                      |
| PS-16-01                   | N55°55.499' W006°11.332' | Bonahaven Dolomite, Member 4 metapelite                              |
| PS-16-02                   | N55°55.500' W006°11.331' | Bonahaven Dolomite, Member 4 Semi metapelite                         |
|                            |                          | Bonahaven Dolomite, Member 4, Middle of the sandwich cream dolostone |
| PS-16-03                   | N55°55.460' W006°11.331' |                                                                      |
| PS-16-04                   | N55°55.528' W006°11.216' | Bonahaven Dolomite, Member 4, cream dolostone                        |
| PS-16-05                   | N55°55.434' W006°11.230' | Bonahaven Dolomite, Member 3, iron rich dolostone                    |
| PS-16-06                   | N55°55.432' W006°11.199' | Bonahaven Dolomite, Member 2, quartzite                              |
| PS-16-10                   | N55°55.489' W006°11.184' | Bonahaven Dolomite, Low member 4 or high member 3                    |
| PS-16-11                   | N55°55.542' W006°10.769' | Bonahaven Dolomite, Member 3 Muddy dolostone                         |
| PS-16-12                   | N55°55.539' W006°10.644' | Bonahaven Dolomite, Member 3 Dolomitic mudstone                      |
| <b>Port a'Chotain</b>      |                          |                                                                      |
| PC-16-01a                  | N55°55.726' W006°10.069' | Bonahaven Dolomite, Member 4, Foliated                               |
| PC-16-01b                  | N55°55.726' W006°10.069' | Bonahaven Dolomite, Member 4, Massive                                |
| PC-16-02                   | N55°55.672' W006°09.806' | Bonahaven Dolomite, Member 4, Dolostone                              |
| PC-16-03                   | N55°55.760' W006°09.918' | Bonahaven Dolomite, Member 3 (just under member 4), Dolostone        |
| <b>Bagh an da Dhoruis</b>  |                          |                                                                      |
|                            |                          | Bonahaven Dolomite, Member 3 Muddy dolostone under stromatolite      |
| DD-16-04                   | N55°56.005' W006°09.425' |                                                                      |
| DD-16-06                   | N55°56.002' W006°09.072' | Bonahaven Dolomite, Member 3 Muddy dolostone                         |
| DD-16-07                   | N55°55.973' W006°08.664' | Bonahaven Dolomite, Member 4                                         |
| <b>Caol Isla</b>           |                          |                                                                      |

|                  |                          |                                                                                         |
|------------------|--------------------------|-----------------------------------------------------------------------------------------|
| Ci-16-01         | N55°51.375' W006°06.570' | Bonahaven Dolomite, Member 1 unit 1 Metapelite mudstone biotite                         |
| Ci-16-02         | N55°51.431' W006°06.555' | Bonahaven Dolomite, Member 1 unit 4 (very base)                                         |
| Ci-16-23         | N55°51.460' W006°06.531' | Bonahaven Dolomite, Top member 4 mudstone                                               |
| Ci-16-03b        | N55°51.460' W006°06.531' | Bonahaven Dolomite, Base member 5 dolostone                                             |
| <b>Bonahaven</b> |                          |                                                                                         |
| BH-16-01         | N55°52.704' W006°07.118' | Bonahaven Dolomite, Member 1 unit 1 Metapelite with carbonate pebbles                   |
| BH-16-02         | N55°52.750' W006°07.156' | Bonahaven Dolomite, Member 1 unit 4 Mud and siltstone. Unmetamorphosed                  |
| BH-16-03         | N55°52.763' W006°07.168' | Bonahaven Dolomite, Member 1 unit 5 Mud layer growing over mica cement. Unmetamorphosed |
| BH-16-03b        | N55°52.762' W006°07.177' | Bonahaven Dolomite, Member 1 unit 5 Mud layer                                           |
| BH-16-04         | N55°52.987' W006°07.309' | Bonahaven Dolomite, Member 3 Stromatolitic dolostone                                    |
| <b>Lossit</b>    |                          |                                                                                         |
| LL-16-k          | N55°48.293' W006°07.379' | Lossit Limestone                                                                        |
| LL-16-01         | N55°48.194' W006°07.781' | Lossit Limestone                                                                        |
| LL-16-j          | N55°48.317' W006°07.464' | Lossit Limestone, Grey limestone                                                        |
| LL-16-j(b)       | N55°48.323' W006°07.505' | Lossit Limestone, Oolitic dolostone                                                     |
| LL-16-i          | N55°48.374' W006°07.525' | Lossit Limestone, Stromatolitic                                                         |
| LL-16-h          | N55°48.383' W006°07.655' | Lossit Limestone, Slate                                                                 |
| LL-16-g          | N55°48.412' W006°07.732' | Lossit Limestone, Muddy limestone                                                       |
| LL-16-c          | N55°48.451' W006°07.670' | Lossit Limestone, Limestone                                                             |
| LL-16-d          | N55°48.467' W006°07.698' | Lossit Limestone, Muddy layer in metacarbonate (mudstone)                               |
| LL-16-e          | N55°48.435' W006°07.823' | Port Askaig tillite, Muddy layer in diamictite                                          |
|                  |                          | Port Askaig tillite, Magnetic sandstone interlayered by dolostone                       |
| LL-16-f          | N55°48.401' W006°07.863' | diamictite                                                                              |
| LL-16-b2         | N55°48.445' W006°07.609' | Port Askaig tillite, Dolostone diamictite                                               |
| LL-16-b1         | N55°48.442' W006°07.605' | Port Askaig tillite, Mudstone diamictite. Contain a carbonate clast                     |
| LL-16-a          | N55°48.520' W006°07.553' | Port Askaig tillite, Muddy tillite                                                      |
| LL-16-a2         | N55°48.519' W006°07.535' | Port Askaig tillite, Clast of dolostone in tillite                                      |

---

**Creagan Loisgte**

|          |                          |                                                                 |
|----------|--------------------------|-----------------------------------------------------------------|
| CL-16-01 | N55°49.262' W006°06.787' | Port Askaig tillite, Member 3, Dolostone                        |
| CL-16-02 | N55°49.353' W006°06.695' | Port Askaig tillite, Member 3, dolostone, the second diamictite |
| CL-16-03 | N55°49.370' W006°06.747' | Port Askig tillite, Top member 3, Metapelit                     |

---

**Table S2 |** Semi-quantitative bulk XRD mineralogical composition for representative samples measured in weight percent (wt.%). PAT1 and PAT2 are samples collected at Port Askaig. PAT3 represents sample LL-16-a at the top of the LLF that conformably underlie the Port Askaig tillites. nd=not detected.

| <b>Samples</b>  | <b>Quartz</b> | <b>Illite</b> | <b>Calcite</b> | <b>Albite</b> | <b>Kaolinite</b> | <b>Dolomite</b> | <b>Microcline</b> | <b>Pyrite</b> | <b>Hematite</b> |
|-----------------|---------------|---------------|----------------|---------------|------------------|-----------------|-------------------|---------------|-----------------|
| <b>PS-16-11</b> | 33            | 9             | 9              | 7             | nd               | 40              | nd                | 2             | nd              |
| <b>PS-16-12</b> | 36            | 8             | nd             | nd            | 2                | 50              | nd                | nd            | nd              |
| <b>PS-16-13</b> | 50            | 11            | nd             | 11            | nd               | 18              | 7                 | 3             | nd              |
| <b>BH-16-03</b> | 53            | 23            | nd             | 8             | nd               | 13              | nd                | nd            | 3               |
| <b>BH-16-02</b> | 68            | 17            | nd             | 11            | 2                | nd              | nd                | nd            | 2               |
| <b>Ci-16-01</b> | 53            | 35            | nd             | nd            | nd               | nd              | nd                | nd            | nd              |
| <b>PAT1</b>     | 41            | 5             | 5              | 46            | 2                | 1               | nd                | nd            | nd              |
| <b>PAT2</b>     | 48            | 14            | 7              | 25            | 4                | 2               | nd                | nd            | nd              |
| <b>PAT3</b>     | 54            | 16            | nd             | 7             | 2                | 21              | nd                | nd            | nd              |
| <b>LL-16-g</b>  | 55            | 18            | nd             | 12            | 1                | nd              | nd                | nd            | 1               |
| <b>LL-16-i</b>  | 5             | 1             | nd             | 3             | nd               | 91              | nd                | nd            | nd              |
| <b>LL-16-j</b>  | 1             | nd            | 1              | nd            | nd               | 98              | nd                | nd            | nd              |

**Table S3 |** Trace and rare earth elements (ppm) and major elements (wt.%) data for representative samples across the sampled section. LD, lower than detection limit. PATF, Port Askaig Tillite Formation.

|                                | Bonahaven Dolomite Formation (BDF) |          |          |          |          |          |          |          |          |          |          |          |          |          |          | Port Askaig Tillites |                      |          |          |          | Lossit Limestone Formation |         |         |         |         |         |         |         |         |         |         |         |          |          |  |
|--------------------------------|------------------------------------|----------|----------|----------|----------|----------|----------|----------|----------|----------|----------|----------|----------|----------|----------|----------------------|----------------------|----------|----------|----------|----------------------------|---------|---------|---------|---------|---------|---------|---------|---------|---------|---------|---------|----------|----------|--|
|                                |                                    |          |          |          |          |          |          |          |          |          |          |          |          |          |          | PATF                 |                      |          |          |          |                            |         |         |         |         |         |         |         |         |         |         |         |          |          |  |
|                                | PS-16-00                           | PS-16-03 | PS-16-04 | PS-16-05 | PS-16-06 | PS-16-01 | PS-16-08 | PS-16-09 | PS-16-10 | PS-16-11 | PS-16-12 | PS-16-13 | Ci-16-01 | BH-16-02 | BH-16-03 | Port Askaig tillites | Port Askaig tillites | LL-16-a1 | LL-16-a2 | LL-16-a3 | LL-16-d                    | LL-16-d | LL-16-d | LL-16-e | LL-16-e | LL-16-f | LL-16-f | LL-16-f | LL-16-g | LL-16-h | LL-16-f | LL-16-i | LL-16-j1 | LL-16-j2 |  |
| SiO <sub>2</sub>               | 64.3                               | 6.2      | 7.7      | 68.6     | 90.6     | 22.9     | 35.5     | 9.7      | 28.3     | 77.4     | 33.6     | 58.2     | 61.6     | 61.7     | 53.5     | 67.7                 | 69.3                 | 58.7     | 56.3     | 1.7      | 37.8                       | 6.8     | 21.8    | 44.8    | 16.6    | 26.2    | 57.7    | 54.4    | 58.0    | 67.2    | 53.7    | 6.1     | 2.3      | 4.6      |  |
| TiO <sub>2</sub>               | 0.61                               | 0.05     | 0.07     | 0.35     | 0.04     | 0.18     | 0.11     | 0.08     | 0.46     | 0.04     | 0.33     | 0.58     | 0.79     | 0.89     | 0.79     | 0.63                 | 0.36                 | 0.64     | 0.51     | 0.05     | 0.14                       | 0.03    | 0.09    | 0.61    | 0.07    | 0.15    | 0.90    | 0.34    | 0.67    | 0.71    | 0.67    | 0.07    | 0.03     | 0.02     |  |
| Al <sub>2</sub> O <sub>3</sub> | 15.4                               | 1.0      | 1.6      | 9.8      | 1.1      | 4.2      | 2.0      | 1.6      | 7.2      | 0.8      | 7.3      | 12.2     | 16.4     | 15.5     | 15.1     | 11.4                 | 10.9                 | 9.4      | 9.0      | 0.7      | 5.5                        | 0.4     | 2.7     | 10.8    | 2.1     | 3.3     | 13.8    | 6.5     | 16.0    | 17.2    | 10.8    | 1.1     | 0.2      | 0.2      |  |
| Fe <sub>2</sub> O <sub>3</sub> | 4.7                                | 0.4      | 0.7      | 3.0      | 0.5      | 3.0      | 1.0      | 2.0      | 9.5      | 1.0      | 3.0      | 4.2      | 6.9      | 7.5      | 7.6      | 6.6                  | 3.9                  | 6.7      | 3.4      | 1.0      | 2.6                        | 1.3     | 2.1     | 16.7    | 2.0     | 4.9     | 12.9    | 10.2    | 4.1     | 3.4     | 10.7    | 1.8     | 0.3      | 0.9      |  |
| MnO                            | 0.006                              | 0.033    | 0.056    | 0.027    | 0.060    | 0.140    | 0.056    | 0.160    | 0.090    | 0.027    | 0.109    | 0.027    | 0.028    | 0.024    | 0.102    | 0.057                | 0.062                | 0.072    | 0.047    | 0.066    | 0.117                      | 0.074   | 0.154   | 0.133   | 0.181   | 0.177   | 0.030   | 0.070   | 0.010   | 0.006   | 0.042   | 0.441   | 0.018    | 0.126    |  |
| MgO                            | 3.00                               | 20.07    | 18.70    | 3.37     | 1.24     | 13.20    | 1.67     | 17.16    | 8.90     | 1.58     | 10.98    | 3.80     | 2.20     | 2.14     | 3.80     | 2.34                 | 1.23                 | 4.23     | 5.80     | 20.76    | 10.49                      | 19.69   | 15.10   | 5.68    | 16.62   | 12.19   | 2.45    | 5.03    | 1.34    | 1.48    | 4.83    | 19.35   | 0.80     | 20.14    |  |
| CaO                            | 0.14                               | 29.33    | 28.73    | 2.78     | 2.06     | 21.37    | 31.83    | 27.43    | 15.15    | 9.19     | 15.22    | 4.03     | 0.25     | 0.66     | 3.21     | 2.23                 | 3.35                 | 5.20     | 7.20     | 30.19    | 15.59                      | 28.43   | 22.33   | 5.25    | 24.66   | 20.54   | 1.37    | 7.92    | 5.36    | <LD     | 5.14    | 28.29   | 54.01    | 29.79    |  |
| Na <sub>2</sub> O              | 0.09                               | 0.43     | 0.39     | 0.08     | 0.17     | 0.75     | 0.19     | 0.54     | 0.70     | 0.01     | 0.04     | 1.36     | 1.90     | 0.87     | 0.70     | 2.19                 | 4.03                 | 0.82     | 1.52     | 0.01     | 1.12                       | 0.01    | 0.02    | 0.05    | 0.08    | 1.02    | 0.09    | 0.45    | 1.25    | 1.14    | 0.08    | 0.36    | 0.00     | 0.00     |  |
| K <sub>2</sub> O               | 7.34                               | 0.23     | 0.47     | 4.58     | 0.46     | 1.56     | 0.83     | 0.46     | 2.95     | 0.30     | 3.50     | 4.81     | 5.81     | 6.18     | 6.42     | 3.20                 | 1.70                 | 3.45     | 2.76     | 0.13     | 1.25                       | 0.14    | 0.70    | 3.63    | 0.03    | 0.17    | 5.01    | 1.78    | 5.00    | 5.83    | 4.36    | 0.20    | 0.06     | 0.02     |  |
| P <sub>2</sub> O <sub>5</sub>  | 0.147                              | 0.045    | 0.061    | 0.151    | 0.026    | 0.086    | 0.054    | 0.073    | 0.146    | 0.080    | 0.176    | 0.191    | 0.218    | 0.238    | 0.285    | 0.217                | 0.146                | 0.228    | 0.166    | 0.041    | 0.054                      | 0.032   | 0.035   | 0.265   | 0.061   | 0.092   | 0.234   | 0.145   | 0.101   | 0.042   | 0.273   | 0.047   | 0.041    | 0.026    |  |
| LOI                            | 3.12                               | 43.10    | 41.75    | 6.04     | 3.12     | 32.07    | 25.03    | 40.39    | 19.38    | 8.52     | 24.32    | 9.38     | 2.84     | 3.60     | 7.37     | 3.53                 | 3.87                 | 9.35     | 12.50    | 45.71    | 24.76                      | 43.33   | 34.71   | 10.85   | 37.91   | 31.29   | 5.12    | 13.47   | 7.23    | 2.87    | 9.74    | 42.68   | 42.53    | 44.59    |  |
|                                |                                    |          |          |          |          |          |          |          |          |          |          |          |          |          |          |                      |                      |          |          |          |                            |         |         |         |         |         |         |         |         |         |         |         |          |          |  |
| Rb                             | 287                                | <LD      | <LD      | 131      | <LD      | 26       | 44       | <LD      | 85       | <LD      | 85       | 139      | 238      | 259      | 283      | 93                   | 43                   | 101      | 81       | <LD      | 27                         | <LD     | <LD     | <LD     | <LD     | <LD     | 177     | 44      | 178     | 229     | 132     | <LD     | <LD      | <LD      |  |
| Sr                             | 6.2                                | 255      | 414      | 31.3     | 27.4     | 301      | 1172     | 315      | 177      | 48.1     | 116      | 60.2     | 39       | 72       | 80       | 113.8                | 176                  | 113      | 157      | 662      | 436                        | 308     | 348     | 249     | 696     | 924     | 512     | 587     | 66.9    | 37.2    | 235     | 277     | 2387     | 330      |  |
| Ba                             | 424                                | 54.3     | 1492     | 505      | 539      | 185      | 1012     | 220      | 304      | 49.4     | 249      | 644      | 670      | 449      | 383      | 512                  | 293                  | 511      | 459      | 12.3     | 193                        | 14.7    | 101     | 479     | 6.4     | 67.4    | 1559    | 578     | 405     | 768     | 794     | 50.2    | 7.3      | 0        |  |
| Sc                             | 12.5                               | 0.8      | 1.2      | 5.6      | 0.7      | 3.2      | 1.6      | 1.2      | 7.1      | 0.6      | 5.8      | 10.4     | 14.7     | 14.4     | 16.3     | 11.1                 | 6.7                  | 11.0     | 9.1      | 0.6      | 3.5                        | 0.3     | 1.7     | 13.5    | 1.4     | 5.2     | 18.8    | 8.7     | 11.4    | 13.1    | 12.3    | 1.0     | 0.4      | 0.1      |  |
| V                              | 84.3                               | 6.6      | 9.3      | 38.4     | 7.1      | 22.7     | 15.0     | 15.5     | 61.4     | 6.4      | 54.7     | 70.7     | 80.8     | 103      | 91.2     | 82.3                 | 39.6                 | 89.5     | 80.0     | 6.0      | 21.8                       | 6.5     | 11.5    | 95.4    | 8.4     | 12.8    | 158     | 67.0    | 64.5    | 64.9    | 98.4    | 5.9     | 2.7      | 3.0      |  |
| Cr                             | 52.6                               | 5.2      | 6.4      | 33.4     | 33.2     | 19.3     | 12.1     | 8.7      | 39.0     | 7.2      | 33.0     | 60.3     | 61.1     | 61.5     | 48.1     | 57.8                 | 30.0                 | 53.8     | 46.4     | 6.2      | 17.3                       | 3.0     | 8.0     | 49.9    | 13.1    | 14.8    | 52.6    | 28.6    | 73.5    | 76.8    | 50.3    | 6.4     | 3.6      | 3.4      |  |
| Co                             | 9.1                                | 4.5      | 5.6      | 26.8     | 85.4     | 5.2      | 19.3     | 3.8      | 25.7     | 54.1     | 22.0     | 30.9     | 27.0     | 14.0     | 15.8     | 20.9                 | 28.2                 | 26.4     | 33.5     | 3.8      | 7.2                        | 6.4     | 9.5     | 11.3    | 7.1     | 8.6     | 8.0     | 22.6    | 19.8    | 13.2    | 15.2    | 6.7     | 2.4      | 5.8      |  |
| Ni                             | 9.2                                | 2.6      | 3.3      | 10.9     | 2.5      | 7.8      | 3.0      | 3.6      | 54.5     | 7.1      | 16.1     | 29.3     | 30.3     | 25.5     | 31.5     | 27.5                 | 16.9                 | 19.3     | 27.7     | 5.0      | 8.8                        | 3.4     | 5.2     | 24.1    | 4.8     | 7.0     | 15.2    | 9.7     | 26.7    | 6.6     | 17.5    | 3.0     | 2.0      | 2.9      |  |
| Y                              | 21.4                               | 4.9      | 9.1      | 15.5     | 3.6      | 18.2     | 23.3     | 10.2     | 27.9     | 6.3      | 21.3     | 19.7     | 19.0     | 36.9     | 34.4     | 19.4                 | 24.2                 | 14.9     | 15.5     | 2.8      | 9.8                        | 2.5     | 7.1     | 17.5    | 7.8     | 17.0    | 15.3    | 13.1    | 10.5    | 14.9    | 16.6    | 7.9     | 2.6      | 9.8      |  |
| Zr                             | 173                                | 12.0     | 18.5     | 163      | 18.8     | 57.7     | 76.9     | 34.7     | 178      | 14.7     | 94.1     | 147      | 181      | 256      | 205      | 154                  | 133                  | 121      | 130      | 11.0     | 37.2                       | 7.8     | 45      | 110     | 16.2    | 32.4    | 162     | 70.6    | 171     | 195     | 115     | 33.7    | 2.4      | 2.4      |  |
| Nb                             | 21.9                               | 0.3      | 1.5      | 7.9      | 1.0      | 3.2      | 2.8      | 2.4      | 13.4     | 1.2      | 7.3      | 13.2     | 22.6     | 28.8     | 25.7     | 15.2                 | 10.6                 | 13.0     | 9.1      | 0.9      | 1.8                        | 0.4     | 2.0     | 11.0    | 1.0     | 3.2     | 12.1    | 2.4     | 13.4    | 18.6    | 17.9    | 1.1     | 0.1      | 0.3      |  |
| La                             | 39.2                               | 3.6      | 4.4      | 17.7     | 5.2      | 6.7      | 7.6      | 5.3      | 18.0     | 4.9      | 12.2     | 25.6     | 18.5     | 54.5     | 27.1     | 21.2                 | 21.4                 | 13.0     | 17.6     | 1.9      | 6.1                        | 2.1     | 4.2     | 19.4    | 3.8     | 7.5     | 36.5    | 14.3    | 17.3    | 48.7    | 20.7    | 5.9     | 2.1      | 3.6      |  |
| Ce                             | 79.7                               | 7.4      | 9.1      | 38.1     | 10.5     | 14.8     | 16.4     | 12.6     | 34.8     | 8.6      | 25.1     | 53.7     | 76.8     | 115      | 57.3     | 44.3                 | 45.2                 | 28.3     | 37.1     | 5.0      | 11.5                       | 4.1     | 10.7    | 38.9    | 7.0     | 19.8    | 72.7    | 29.4    | 33.4    | 99.0    | 40.7    | 13.2    | 6.3      | 9.1      |  |
| Nd                             | 36.6                               | 3.7      | 5.6      | 17.7     | 4.8      | 8.6      | 8.6      | 5.1      | 17.5     | 5.1      | 13.2     | 24.0     | 19.4     | 54.8     | 26.7     | 18.8                 | 20.3                 | 14.3     | 16.5     | 2.5      | 7.2                        | 2.7     | 5.1     | 20.2    | 5.1     | 10.9    | 32.6    | 16.5    | 16.2    | 49.0    | 20.1    | 6.2     | 1.5      | 4.7      |  |
| Sm                             | 6.4                                | 1.0      | 1.1      | 3.4      | 0.8      | 2.2      | 2.7      | 1.3      | 3.7      | 1.0      | 3.1      | 4.6      | 4.3      | 10.7     | 5.3      | 3.7                  | 4.4                  | 2.6      | 3.6      | 0.3      | 1.5                        | 1.0     | 0.8     | 3.9     | 0.9     | 2.2     | 6.1     | 3.9     | 2.8     | 9.1     | 3.7     | 1.4     | 0.2      | 0.9      |  |
| Eu                             | 1.19                               | 0.20     | 0.32     | 0.62     | 0.28     | 0.74     | 1.60     | 0.37     | 0.70     | 0.25     | 0.63     | 0.75     | 0.70     | 1.66     | 1.01     | 0.69                 | 0.81                 | 0.70     | 0.65     | 0.05     | 0.33                       | 0.07    | 0.23    | 0.83    | 0.24    | 0.56    | 1.21    | 0.65    | 0.29    | 1.65    | 0.73    | 0.11    | 0.02     | 0.10     |  |
| Gd                             | 5.1                                | 0.5      | 1.2      | 3.0      | 0.7      | 2.9      | 3.2      | 1.5      | 4.5      | 1.2      | 3.3      | 4.0      | 4.2      | 7.7      | 5.7      | 2.8                  | 4.2                  | 2.8      | 3.1      | 0.0      | 1.5                        | 0.4     | 1.0     | 3.6     | 1.1     | 2.7     | 4.0     | 2.5     | 2.2     | 6.5     | 3.0     | 1.1     | 0.4      | 1.3      |  |
| Dy                             | 3.8                                | 0.8      | 1.3      | 2.4      | 0.6      | 3.2      | 3.6      | 1.7      | 4.8      | 1.0      | 3.4      | 3.1      | 3.8      | 6.4      | 5.6      | 2.3                  | 3.9                  | 2.6      | 2.4      | 0.5      | 1.4                        | 0.3     | 0.9     | 3.1     | 1.1     | 2.7     | 2.6     | 2.5     | 1.9     | 3.1     | 2.8     | 1.2     | 0.3      | 1.5      |  |
| Er                             | 1.9                                | 0.7      | 0.5      | 1.6      | 0.1      | 1.8      | 2.0      | 1.3      | 2.8      | 0.4      | 2.1      | 2.1      | 1.6      | 3.5      | 3.1      | 1.1                  | 2.2                  | 1.7      | 1.7      | 0.3      | 1.2                        | 0.4     | 0.3     | 2.0     | 0.5     | 1.5     | 1.5     | 1.4     | 1.2     | 1.4     | 1.6     | 0.3     | 0.3      | 0.6      |  |
| Yb                             | 2.46                               | 0.39     | 0.76     | 1.56     | 0.27     | 1.54     | 2.27     | 0.77     | 2.97     | 0.59     | 1.85     | 2.17     | 2.23     | 3.90     | 3.54     | 1.35                 | 2.80                 | 1.65     | 1.75     | 0.23     | 0.99                       | 0.17    | 0.63    | 1.96    | 0.63    | 1.52    | 1.84    | 1.27    | 1.54    | 1.77    | 1.76    | 0.64    | 0.15     | 0.84     |  |
| Th                             | 10.0                               | 1.1      | 1.7      | 5.7      | 0.8      | 2.5      | 3.0      | 1.6      | 8.8      | 1.4      | 5.1      | 9.1      | 21.9     | 17.8     | 14.0     | 7.0                  | 24.2                 | 3.5      | 5.4      | 0.8      | 1.9                        | 0.2     | 1.8     | 5.3     | 1.4     | 2.3     | 7.7     | 4.2     | 9.8     | 12.7    | 5.5     | 2.2     | 0.3      | 1.4      |  |

**Table S4** | Bulk iron isotope data for sampled cross section.

| Sample   | Redox              | $\delta^{56/54}\text{Fe}$ (‰ IRMM) | 2sd        | $\delta^{57/54}\text{Fe}$ (‰ IRMM) | 2sd        |
|----------|--------------------|------------------------------------|------------|------------------------------------|------------|
| PS16-01  | Anoxic/ferruginous | 0.215405186                        | 0.05467559 | 0.31888514                         | 0.1368159  |
| PS16-02  | Anoxic/ferruginous | -0.18805042                        | 0.05467559 | -0.2567931                         | 0.1368159  |
| PS16-10  | ?/ferruginous      | 0.119779336                        | 0.05467559 | 0.2126936                          | 0.1368159  |
| PS16-11  | Anoxic/ferruginous | 0.140901425                        | 0.05467559 | 0.19806062                         | 0.1368159  |
| PS16-12  | Anoxic/ferruginous | 0.515277145                        | 0.05467559 | 0.75800868                         | 0.1368159  |
| DD16-04  | Anoxic/ferruginous | 0.275878871                        | 0.05467559 | 0.41860195                         | 0.1368159  |
| DD16-06  | Anoxic/ferruginous | 0.075870849                        | 0.05467559 | 0.1294508                          | 0.1368159  |
| BH16-03b | Oxic/ferruginous   | 0.394539782                        | 0.05467559 | 0.51466223                         | 0.1368159  |
| BH16-03  | Oxic/ferruginous   | 0.107515842                        | 0.05467559 | 0.12859005                         | 0.1368159  |
| BH16-02  | Oxic/ferruginous   | 0.206767384                        | 0.05467559 | 0.36096346                         | 0.1368159  |
| Ci16-01  | Oxic/ferruginous   | 0.127659478                        | 0.05467559 | 0.14509852                         | 0.1368159  |
| BH16-01  | Oxic/ferruginous   | 0.18512519                         | 0.05467559 | 0.29501582                         | 0.1368159  |
| CI16-02  | Anoxic/ferruginous | 0.02869971                         | 0.05467559 | 0.00057598                         | 0.1368159  |
| CI16-03b | Anoxic/ferruginous | 0.139915033                        | 0.05467559 | 0.17478635                         | 0.1368159  |
| LL16-a   | Anoxic/ferruginous | 0.316555954                        | 0.05467559 | 0.47225133                         | 0.1368159  |
| LL16-b1  | Anoxic/ferruginous | -0.36464086                        | 0.05467559 | -0.5050093                         | 0.1368159  |
| LL16-01  | Anoxic/ferruginous | 0.018283823                        | 0.05467559 | 0.01916605                         | 0.1368159  |
| LL16-c   | Anoxic/ferruginous | 0.033044669                        | 0.05467559 | -0.0394956                         | 0.1368159  |
| LL16-d   | Anoxic/ferruginous | 0.605696336                        | 0.05467559 | 0.8714074                          | 0.1368159  |
| LL16-g   | Anoxic/ferruginous | 0.088431765                        | 0.0873112  | 0.14120006                         | 0.15361095 |
| LL16-h   | Anoxic/ferruginous | 0.272097494                        | 0.05467559 | 0.43754128                         | 0.1368159  |
| LL-16-i  | Anoxic/ferruginous | 0.209865936                        | 0.05467559 | 0.33961185                         | 0.1368159  |

## Supplementary References

1. Banner, J.L. & Hanson, G.N. Calculation of simultaneous isotopic and trace element variations during water-rock interaction with applications to carbonate diagenesis. *Geochim. Cosmo. Acta* **54**, 3123–3137 (1990).
2. Derry, L.A. A burial diagenesis origin for the Ediacaran Shuram–Wonoka carbon isotope anomaly. *Earth Plan. Sci. Lett.* **294**, 152–162 (2010).
3. Arnaud, E. & Fairchild, I.J. The Port Askaig Formation, Dalradian Supergroup, Scotland. *Geol. Soc. London Mem.* **36**, 635–642 (2011).
4. Brasier, M.D. & Shields, G. Neoproterozoic chemostratigraphy and correlation of the Port Askaig glaciation, Dalradian Supergroup of Scotland. *J. Geol. Soc. London* **157**, 909–914 (2000).
5. Thomas, C.W., Graham, C.M., Ellam, R.M. & Fallick, A.E.  $^{87}\text{Sr}/^{86}\text{Sr}$  chemostratigraphy of Neoproterozoic Dalradian limestones of Scotland and Ireland: constraints on depositional ages and time scales. *J. Geol. Soc. London* **161**, 229–242 (2004).
6. Fairchild, I.J. et al. Tonian-Cryogenian boundary sections of Argyll, Scotland. *Pre. Res.* **319**, 37–64 (2018).
7. Sawaki Y, et al.  $^{87}\text{Sr}/^{86}\text{Sr}$  chemostratigraphy of Neoproterozoic Dalradian carbonates below the Port Askaig Glaciogenic Formation, Scotland. *Pre. Res.* **179**, 150–164 (2010).
8. Hayashi K-I, Fujisawa H, Holland HD, Ohmoto H. Geochemistry of ~ 1.9 Ga sedimentary rocks from northeastern Labrador, Canada. *Geochim. Cosmo. Acta* **61**, 4115–4137 (1997).
9. Pecoits, E., Gingras, M.K., Barley, M.E., Kappler, A., Posth, N.R. & Konhauser KO. Petrography and geochemistry of the Dales Gorge banded iron formation: Paragenetic sequence, source and implications for palaeo-ocean chemistry. *Pre. Res.* **172**, 163–187 (2009).
10. Rudnick RL, Gao S. Composition of the continental crust. In *The Crust*, vol. 3 (ed. Rudnick RL). Elsevier, 1-64 ((2003).
11. Kasemann, S.A., Hawkesworth, C.J., Prave, A.R., Fallick, A.E. & Pearson, P.N. Boron and calcium isotope composition in Neoproterozoic carbonate rocks from Namibia: Evidence for extreme environmental change. *Earth and Plan. Sci. Lett.* **231**, 73-86 (2005).
12. Millot, R., Vigier, N. & Gaillardet, J. 2010. Behaviour of lithium and its isotopes during weathering in the Mackenzie Basin, Canada. *Geochim. Cosmochim. Acta* **74**, 3897-3912 (2010).
13. Verney-Carron, A., Vigier, N. & Millot, R. Experimental determination of the role of diffusion on Li isotope fractionation during basaltic glass weathering, *Geochim. Cosmochim. Acta* **75**, 3452-3468 (2011).
14. Vigier, N., Gislason, S.R., Burton, K.W., Millot, R. & Mokadem, F. The relationship between riverine lithium isotope composition and silicate weathering rates in Iceland. *Earth Plan. Sci. Lett.* **287**, 434-441 (2009).
15. Rooney, A.D., Chew, D.M. & Selby, D.) Re–Os geochronology of the Neoproterozoic–Cambrian Dalradian Supergroup of Scotland and Ireland: Implications for Neoproterozoic stratigraphy, glaciations and Re–Os systematics. *Pre. Res.* **185**, 202–214 (2011).
16. Prave, T., Fallick, A.E., Thomas, C.W. & Graham, C.M. A composite C-isotope profile for the Neoproterozoic Dalradian Supergroup of Scotland and Ireland. *J.*

- Geol. Soc.* **166**, 845–857 (2009).
17. Fairchild, I.J., et al. The Late Cryogenian Warm Interval, NE Svalbard: Chemostratigraphy and genesis. *Pre. Res.* **281**, 128–154 (2016).
  18. Raiswell, R. et al. The iron paleoredox proxies: A guide to the pitfalls, problems and proper practice. *Am. J. Sci.* **318**, 491–526 (2018).
  19. Poulton, S.W. & Canfield, D.E. Ferruginous conditions: A dominant feature of the ocean through Earth's history. *Elements* **7**, 107-112 (2012).
  20. Hardisty, D.S. et al. An evaluation of sedimentary molybdate and iron as proxies for pre fluid paleoredox conditions. *Am. J. Sc.* **318**, 527–556 (2018).
