# Supplementary material for: Transient fertilization of a post-Sturtian Snowball ocean margin with dissolved phosphate by clay minerals
Source: Nat Commun. 2023 Dec 18;14:8418. doi: 10.1038/s41467-023-44240-9 (PMC10728154; doi:10.1038/s41467-023-44240-9)
Supplement: Supplementary file 3 — Description of Additional Supplementary Files [file 41467_2023_44240_MOESM3_ESM.pdf]

## **Description of Additional Supplementary Files:**

**Supplementary Dataset 1:** Carbon Systematics

**Supplementary Dataset 2:** Major, Trace and Rare Earth Element Analysis

**Supplementary Dataset 3:** Iron Speciation Analysis

**Supplementary Dataset 4:** Co-extraction of Iron and Phosphorus

**Supplementary Dataset 5:** Semi-quantitative XRD mineralogical Analysis

**Supplementary Dataset 6:** Iron Isotope Analysis
